# Supplementary material for: Intentional Drug Overdose Deaths in the United States
Source: Atypon-hosted journal article supplement (doi:10.1176/appi.ajp.2021.21060604), 2022-02-01
Supplement: appi.ajp.2021.21060604.ds001.pdf [file appi.ajp.2021.21060604.ds001.pdf]

Supplemental Table 1. Age-adjusted<sup>§</sup> intentional overdose death rates per 100,000 population and 95% confidence interval by age, race/ethnicity, and sex: U.S., 2001-2019

|                      | 2001    | 2002    | 2003    | 2004    | 2005    | 2006    | 2007    | 2008    | 2009    | 2010    | 2011    | 2012    | 2013    | 2014    | 2015    | 2016    | 2017    | 2018    | 2019     | Trends                                                                                                                          |
|----------------------|---------|---------|---------|---------|---------|---------|---------|---------|---------|---------|---------|---------|---------|---------|---------|---------|---------|---------|----------|---------------------------------------------------------------------------------------------------------------------------------|
| U.S. men             | 1.2     | 1.3     | 1.3     | 1.4     | 1.4     | 1.4     | 1.4     | 1.5     | 1.6     | 1.6     | 1.6     | 1.6*    | 1.6     | 1.5     | 1.3     | 1.3     | 1.3     | 1.2     | 1.2      | 2001-2012: APC=2.5 (1.9, 3.0), p<0.001;<br>2012-2019: APC= -4.9 (-5.9, -3.8), p<0.001                                           |
|                      | 1.2-1.3 | 1.3-1.4 | 1.3-1.4 | 1.3-1.4 | 1.3-1.4 | 1.4-1.5 | 1.4-1.5 | 1.5-1.6 | 1.5-1.6 | 1.6-1.7 | 1.5-1.6 | 1.6-1.7 | 1.5-1.7 | 1.5-1.6 | 1.3-1.4 | 1.2-1.3 | 1.3-1.4 | 1.2-1.3 | 1.1-1.2  | 2001-2019: AAPC=-0.4 (-0.9, 0.1), p=0.089                                                                                       |
| Men aged 15-24       | 0.5     | 0.6     | 0.6     | 0.7     | 0.6     | 0.6     | 0.7     | 0.6     | 0.7     | 0.8     | 0.7     | 0.7*    | 0.8     | 0.6     | 0.6*    | 0.6     | 0.7     | 0.7     | 0.8      | 2001-2012: APC=3.1 (2.2, 4.0), p<0.001                                                                                          |
|                      | 0.4-0.6 | 0.5-0.7 | 0.5-0.7 | 0.6-0.8 | 0.5-0.7 | 0.5-0.7 | 0.6-0.8 | 0.5-0.7 | 0.6-0.8 | 0.6-0.9 | 0.6-0.8 | 0.6-0.8 | 0.7-0.9 | 0.5-0.7 | 0.5-0.7 | 0.5-0.7 | 0.6-0.8 | 0.6-0.8 | 0.6-0.9  | 2015-2019: APC=6.7 (1.7, 11.8), p=0.012                                                                                         |
| Men aged 25-34       | 1.3     | 1.5     | 1.4     | 1.6     | 1.4     | 1.6     | 1.5     | 1.5     | 1.6     | 1.6     | 1.5     | 1.8*    | 1.4     | 1.5     | 1.2     | 1.2     | 1.4     | 1.2     | 1.1      | 2001-2012: APC=1.1 (0.4, 1.8), p=0.005;<br>2012-2019: APC= -5.0 (-6.5, 3.6), p<0.001                                            |
|                      | 1.2-1.5 | 1.4-1.7 | 1.2-1.6 | 1.4-1.7 | 1.2-1.5 | 1.4-1.7 | 1.4-1.7 | 1.3-1.7 | 1.4-1.7 | 1.4-1.8 | 1.4-1.7 | 1.6-1.9 | 1.3-1.6 | 1.3-1.7 | 1.1-1.4 | 1.0-1.3 | 1.2-1.5 | 1.1-1.3 | 1.0-1.3  | 2001-2019: AAPC= -1.3 (-2.0, -0.7), p<0.001                                                                                     |
| Men aged 35-44       | 2.6     | 2.5     | 2.6     | 2.5     | 2.5     | 2.5     | 2.4     | 2.6     | 2.5     | 2.3     | 2.4     | 2.4     | 2.3*    | 2.3     | 1.8     | 1.8     | 1.9     | 1.6     | 1.5      | 2001-2013: APC= -0.8 (-1.4, -0.3), p=0.008;<br>2013-2019: APC= -7.0 (-9.0, -5.1), p<0.001                                       |
|                      | 2.4-2.8 | 2.3-2.7 | 2.3-2.8 | 2.3-2.7 | 2.3-2.7 | 2.3-2.7 | 2.2-2.6 | 2.3-2.8 | 2.2-2.7 | 2.1-2.6 | 2.2-2.6 | 2.2-2.6 | 2.1-2.5 | 2.1-2.5 | 1.6-2.0 | 1.6-2.0 | 1.7-2.1 | 1.4-1.8 | 1.3-1.7  | 2001-2019: AAPC= -2.9 (-3.7, -2.2), p<0.001                                                                                     |
| Men aged 45-54       | 2.4     | 2.7     | 2.7     | 2.8     | 2.8     | 3.1     | 3.1     | 3.5     | 3.4     | 3.7*    | 3.4     | 3.4     | 3.3*    | 3.1     | 2.8     | 2.5     | 2.6     | 2.3     | 2.1      | 2001-2010: APC=4.3 (3.7, 5.0), p<0.001                                                                                          |
|                      | 2.2-2.6 | 2.5-2.9 | 2.5-2.9 | 2.6-3.1 | 2.5-3.0 | 2.9-3.3 | 2.9-3.4 | 3.3-3.8 | 3.2-3.7 | 3.4-3.9 | 3.1-3.6 | 3.2-3.7 | 3.0-3.5 | 2.9-3.3 | 2.6-3.1 | 2.3-2.7 | 2.4-2.8 | 2.1-2.5 | 1.9-2.3  | 2013-2019: APC= -6.8 (-8.0, -5.6), p<0.001                                                                                      |
| Men aged 55-64       | 1.2     | 1.5     | 1.6     | 1.8     | 1.9     | 2.2     | 2.3     | 2.3     | 2.6     | 2.9     | 2.8*    | 2.9     | 3.0     | 2.8     | 2.7     | 2.5     | 2.4     | 2.3     | 2.4      | 2001-2011: APC=8.3 (7.3, 9.2), p<0.001;<br>2011-2019: APC= -3.4 (-4.3, -2.6), p<0.001                                           |
|                      | 1.0-1.4 | 1.3-1.7 | 1.4-1.8 | 1.6-2.1 | 1.7-2.1 | 1.9-2.4 | 2.1-2.5 | 2.1-2.6 | 2.3-2.8 | 2.7-3.2 | 2.6-3.1 | 2.7-3.1 | 2.8-3.2 | 2.5-3.0 | 2.5-2.9 | 2.3-2.8 | 2.2-2.6 | 2.1-2.5 | 2.2-2.6  | 2001-2019: AAPC=2.9 (2.3, 3.5), p<0.001                                                                                         |
| Men aged 65-74       | 1.0     | 0.9     | 0.8     | 0.7     | 0.9     | 0.8     | 1.0     | 1.5     | 1.4     | 1.3     | 1.5     | 1.5     | 1.8*    | 1.7     | 1.5     | 1.5     | 1.5     | 1.8     | 1.5      |                                                                                                                                 |
|                      | 0.8-1.2 | 0.7-1.1 | 0.6-1.0 | 0.6-0.9 | 0.8-1.2 | 0.6-1.0 | 0.8-1.3 | 1.2-1.7 | 1.2-1.7 | 1.1-1.5 | 1.3-1.8 | 1.3-1.8 | 1.6-2.1 | 1.4-1.9 | 1.3-1.8 | 1.3-1.7 | 1.3-1.7 | 1.6-2.0 | 1.3-1.7  |                                                                                                                                 |
| Men aged 75-84       | 0.7     | 1.2     | 0.7     | 1.1     | 1.1     | 0.9     | 0.8     | 0.9     | 1.0     | 1.2     | 1.1     | 0.9     | 1.3     | 1.4     | 1.3     | 1.1     | 1.2     | 1.2     | 1.6      | 2001-2019: AAPC=2.7 (1.8, 3.6), p<0.001                                                                                         |
|                      | 0.5-1.0 | 0.9-1.5 | 0.5-1.0 | 0.7-1.2 | 0.8-1.4 | 0.7-1.2 | 0.6-1.1 | 0.7-1.2 | 0.8-1.3 | 0.9-1.6 | 0.9-1.4 | 0.7-1.2 | 1.0-1.6 | 1.1-1.7 | 1.0-1.6 | 0.9-1.5 | 0.9-1.5 | 1.0-1.5 | 1.3-1.9  |                                                                                                                                 |
| Men aged ≥85         | #       | #       | 1.8     | 1.7     | 1.5     | #       | 1.8     | 1.5     | 1.3     | 2.1     | 1.1     | 2.1     | 2.1     | 1.9     | 1.9     | 1.8     | 1.7     | 1.4     | 1.7      |                                                                                                                                 |
|                      | 0.9-2.4 | 0.7-2.0 | 1.1-2.7 | 1.1-2.6 | 0.9-2.2 | 0.5-1.6 | 1.2-2.5 | 1.0-2.2 | 0.8-2.0 | 1.5-2.9 | 0.7-1.7 | 1.5-2.9 | 1.5-2.8 | 1.4-2.6 | 1.4-2.6 | 1.3-2.5 | 1.2-2.3 | 0.9-1.9 | 1.2-2.3  |                                                                                                                                 |
| NH White men         | 1.5     | 1.6     | 1.6     | 1.7     | 1.7     | 1.8     | 1.9     | 1.9     | 2.0     | 2.1     | 2.0     | 2.1*    | 2.1     | 2.0     | 1.8     | 1.6     | 1.8     | 1.6     | 1.5      | 2001-2012: APC=2.9 (2.4, 3.5), p<0.001;<br>2012-2019: APC= -4.8 (-5.9, -3.8), p<0.001                                           |
|                      | 1.5-1.6 | 1.6-1.7 | 1.5-1.7 | 1.6-1.8 | 1.6-1.8 | 1.7-1.9 | 1.8-2.0 | 1.9-2.0 | 1.9-2.1 | 2.0-2.2 | 1.9-2.1 | 2.0-2.2 | 2.0-2.2 | 1.9-2.1 | 1.7-1.8 | 1.5-1.7 | 1.7-1.9 | 1.5-1.7 | 1.5-1.6  |                                                                                                                                 |
| NH Black men         | 0.5     | 0.5     | 0.4     | 0.4     | 0.5     | 0.5     | 0.4     | 0.6     | 0.5     | 0.6*    | 0.5     | 0.6     | 0.6     | 0.5     | 0.5     | 0.5     | 0.4     | 0.5     | 0.5      |                                                                                                                                 |
|                      | 0.3-0.5 | 0.4-0.6 | 0.3-0.5 | 0.3-0.5 | 0.4-0.6 | 0.4-0.7 | 0.3-0.6 | 0.5-0.7 | 0.4-0.6 | 0.5-0.7 | 0.4-0.6 | 0.5-0.7 | 0.5-0.7 | 0.4-0.6 | 0.4-0.6 | 0.4-0.6 | 0.3-0.5 | 0.4-0.6 | 0.4, 0.6 |                                                                                                                                 |
| NH Asian Pacific men | 0.4     | 0.5     | 0.4     | 0.5     | 0.4     | 0.5     | 0.5     | 0.4     | 0.6     | 0.5     | 0.6*    | 0.6     | 0.6     | 0.6     | 0.5     | 0.5     | 0.5     | 0.6     | 0.6      |                                                                                                                                 |
|                      | 0.3-0.6 | 0.3-0.7 | 0.3-0.6 | 0.3-0.7 | 0.2-0.6 | 0.3-0.7 | 0.3-0.7 | 0.3-0.6 | 0.5-0.9 | 0.4-0.7 | 0.5-0.8 | 0.5-0.8 | 0.4-0.8 | 0.4-0.7 | 0.4-0.7 | 0.4-0.7 | 0.4-0.7 | 0.4-0.8 | 0.5-0.8  |                                                                                                                                 |
| Hispanic men         | 0.4     | 0.5     | 0.5     | 0.6     | 0.6     | 0.6     | 0.7*    | 0.6     | 0.7     | 0.7     | 0.5     | 0.6     | 0.6     | 0.6     | 0.5     | 0.6     | 0.5     | 0.5     | 0.6      | 2001-2007: APC=6.2 (2.1, 10.5), p=0.006;<br>2007-2019: APC= -2.1 (-3.0, -1.1), p<0.001                                          |
|                      | 0.3-0.5 | 0.4-0.7 | 0.4-0.7 | 0.4-0.7 | 0.5-0.7 | 0.5-0.7 | 0.5-0.8 | 0.5-0.8 | 0.6-0.8 | 0.6-0.8 | 0.4-0.6 | 0.5-0.7 | 0.5-0.7 | 0.5-0.7 | 0.4-0.6 | 0.5-0.7 | 0.4-0.6 | 0.4-0.6 | 0.5-0.7  |                                                                                                                                 |
| U.S. women           | 1.3     | 1.4     | 1.4     | 1.5     | 1.5     | 1.6     | 1.6*    | 1.6     | 1.6     | 1.7     | 1.7     | 1.7     | 1.7     | 1.7     | 1.7*    | 1.7     | 1.6     | 1.6     | 1.5      | 2001-2007: APC=3.8 (3.2, 4.4), p<0.001;<br>2007-2015: APC=1.0 (0.6-1.4), p<0.001;<br>2015-2019: APC= -3.5 (-4.5, -2.5), p<0.001 |
|                      | 1.2-1.3 | 1.3-1.4 | 1.3-1.4 | 1.4-1.6 | 1.4-1.5 | 1.5-1.6 | 1.6-1.7 | 1.6-1.7 | 1.6-1.7 | 1.6-1.7 | 1.6-1.8 | 1.6-1.8 | 1.6-1.8 | 1.7-1.8 | 1.7-1.8 | 1.6-1.7 | 1.6-1.7 | 1.5-1.6 | 1.5-1.6  | 2001-2019: AAPC=0.9 (0.6, 1.2), p<0.001                                                                                         |
| Women aged 15-24     | 0.6     | 0.6     | 0.5     | 0.6     | 0.6     | 0.5     | 0.5     | 0.5     | 0.6     | 0.6     | 0.6     | 0.6     | 0.7     | 0.6*    | 0.7     | 0.7     | 0.9     | 0.9     | 1.0      | 2014-2019: APC=10.8 (6.7, 15.0), p<0.001                                                                                        |
|                      | 0.5-0.7 | 0.5-0.7 | 0.4-0.6 | 0.5-0.7 | 0.5-0.7 | 0.4-0.6 | 0.4-0.6 | 0.4-0.6 | 0.5-0.7 | 0.5-0.7 | 0.5-0.7 | 0.5-0.7 | 0.6-0.8 | 0.5-0.7 | 0.5-0.8 | 0.6-0.8 | 0.7-1.0 | 0.7-1.0 | 0.8-1.1  | 2001-2019: AAPC=3.2 (2.0-4.4), p<0.001                                                                                          |
| Women aged 25-34     | 1.2     | 1.2     | 1.4     | 1.4     | 1.3     | 1.6     | 1.4     | 1.5     | 1.3     | 1.6     | 1.6*    | 1.5     | 1.3     | 1.4     | 1.3     | 1.2     | 1.2     | 1.2     | 1.1      | 2001-2011: APC=2.0 (0.9, 3.1), p=0.001;<br>2011-2019: APC= -4.1 (-5.6, -2.6), p<0.001                                           |
|                      | 1.0-1.3 | 1.1-1.4 | 1.2-1.6 | 1.2-1.5 | 1.2-1.5 | 1.4-1.8 | 1.3-1.6 | 1.4-1.7 | 1.1-1.4 | 1.4-1.8 | 1.4-1.7 | 1.3-1.7 | 1.2-1.5 | 1.3-1.6 | 1.1-1.4 | 1.1-1.3 | 1.1-1.4 | 1.0-1.3 | 1.0-1.3  | 2001-2019: AAPC= -0.8 (-1.6, 0.1), p=0.072                                                                                      |

|                        |         |         |         |         |         |         |         |         |         |         |         |         |         |         |         |         |         |         |         |                                                                                                                                                                             |
|------------------------|---------|---------|---------|---------|---------|---------|---------|---------|---------|---------|---------|---------|---------|---------|---------|---------|---------|---------|---------|-----------------------------------------------------------------------------------------------------------------------------------------------------------------------------|
| Women aged 35-44       | 2.3     | 2.6     | 2.4     | 2.7     | 2.6     | 2.7     | 2.5     | 2.9*    | 2.7     | 2.6     | 2.8     | 2.6     | 2.5     | 2.8     | 2.6*    | 2.4     | 2.2     | 2.1     | 1.9     | 2001–2008: APC=1.9 (0.6, 3.2), p=0.009;<br>2015–2019: APC=-7.4 (-10.8, -3.9), p<0.001<br>2001–2019: AAPC=-1.3 (-2.3, -0.3), p=0.012                                         |
|                        | 2.1-2.4 | 2.4-2.8 | 2.2-2.6 | 2.5-2.9 | 2.4-2.8 | 2.5-2.9 | 2.3-2.7 | 2.7-3.2 | 2.5-3.0 | 2.4-2.8 | 2.5-3.0 | 2.4-2.9 | 2.3-2.7 | 2.6-3.1 | 2.4-2.8 | 2.2-2.6 | 2.0-2.4 | 1.9-2.3 | 1.7-2.1 |                                                                                                                                                                             |
| Women aged 45-54       | 2.9     | 3.0     | 3.1     | 3.4     | 3.3     | 3.5     | 3.9     | 3.6     | 3.6     | 3.7     | 3.7     | 3.8*    | 3.8     | 3.5     | 3.8     | 3.7     | 3.4     | 3.0     | 3.2     | 2001–2012: APC=2.3 (1.4, 3.3), p<0.001;<br>2012–2019: APC=-3.0 (-4.8, -1.1), p<0.001                                                                                        |
|                        | 2.7-3.1 | 2.8-3.3 | 2.8-3.3 | 3.1-3.6 | 3.1-3.6 | 3.3-3.8 | 3.6-4.1 | 3.4-3.9 | 3.4-3.9 | 3.4-3.9 | 3.4-4.0 | 3.6-4.1 | 3.5-4.1 | 3.3-3.8 | 3.5-4.0 | 3.5-4.0 | 3.2-3.7 | 2.8-3.2 | 3.0-3.5 |                                                                                                                                                                             |
| Women aged 55-64       | 1.7     | 1.9     | 2.0     | 2.1     | 2.3     | 2.6     | 3.0*    | 2.8     | 3.0     | 3.2     | 3.2     | 3.3     | 3.4     | 3.4     | 3.5*    | 3.4     | 3.1     | 3.2     | 2.9     | 2001–2007: APC=9.0 (7.4, 10.7), p<0.001;<br>2007–2015: APC=2.8 (1.9, 3.6), p<0.001;<br>2015–2019: APC=-4.8 (-6.8, -2.8), p<0.001<br>2001–2019: AAPC=3.0 (2.3, 3.8), p<0.001 |
|                        | 1.5-2.0 | 1.7-2.2 | 1.7-2.2 | 1.9-2.4 | 2.0-2.5 | 2.4-2.9 | 2.7-3.2 | 2.6-3.1 | 2.7-3.2 | 2.9-3.4 | 3.0-3.5 | 3.1-3.6 | 3.2-3.7 | 3.2-3.7 | 3.2-3.7 | 3.1-3.6 | 2.9-3.3 | 2.9-3.4 | 2.6-3.1 |                                                                                                                                                                             |
| Women aged 65-74       | 0.9     | 1.1     | 1.1     | 1.0     | 1.1     | 1.2     | 1.5     | 1.5     | 1.6     | 1.6     | 1.7     | 1.9     | 2.0     | 2.2*    | 2.0     | 2.2     | 2.3     | 2.3     | 2.1     |                                                                                                                                                                             |
|                        | 0.7-1.1 | 0.9-1.3 | 0.9-1.3 | 0.8-1.2 | 1.0-1.4 | 1.0-1.4 | 1.2-1.7 | 1.3-1.7 | 1.3-1.8 | 1.4-1.8 | 1.5-2.0 | 1.7-2.1 | 1.7-2.2 | 1.9-2.4 | 1.7-2.2 | 2.0-2.5 | 2.1-2.5 | 2.0-2.5 | 1.9-2.3 |                                                                                                                                                                             |
| Women aged 75-84       | 0.8     | 0.9     | 1.0     | 0.9     | 1.1     | 1.0     | 1.1     | 1.2     | 1.2     | 1.1     | 1.2     | 1.3     | 1.3     | 1.4     | 1.3     | 1.4     | 1.3     | 1.3     | 1.7     | 2001–2019: AAPC=2.7 (2.2, 3.3), p<0.001                                                                                                                                     |
|                        | 0.6-1.0 | 0.7-1.2 | 0.8-1.3 | 0.7-1.2 | 0.9-1.3 | 0.8-1.3 | 0.8-1.3 | 1.0-1.5 | 1.0-1.5 | 0.9-1.3 | 1.0-1.5 | 1.0-1.5 | 1.0-1.5 | 1.2-1.7 | 1.0-1.5 | 1.1-1.7 | 1.1-1.5 | 1.1-1.5 | 1.4-2.0 |                                                                                                                                                                             |
| Women aged ≥85         | 0.7     | 0.7     | ‡       | 0.9     | 1.0     | 1.0     | 1.0     | 0.9     | 0.9     | 1.0     | 0.9     | 1.1     | 1.0     | 1.1     | 1.5     | 1.2     | 1.3     | 1.3     | 1.3     |                                                                                                                                                                             |
|                        | 0.4-1.0 | 0.4-1.1 | 0.4-0.9 | 0.6-1.3 | 0.6-1.4 | 0.7-1.3 | 0.7-1.4 | 0.6-1.2 | 0.6-1.2 | 0.7-1.4 | 0.7-1.3 | 0.8-1.4 | 0.7-1.4 | 0.8-1.4 | 1.1-1.9 | 0.9-1.6 | 1.0-1.7 | 1.0-1.7 | 1.0-1.7 |                                                                                                                                                                             |
| NH White women         | 1.6     | 1.7     | 1.7     | 1.9     | 1.9     | 2.0     | 2.1*    | 2.2     | 2.1     | 2.2     | 2.3     | 2.3     | 2.2     | 2.3     | 2.3*    | 2.3     | 2.2     | 2.1     | 2.0     | 2001–2007: APC=4.8 (4.0, 5.6), p<0.001;<br>2007–2015: APC=1.5 (1.0-2.0), p<0.001;<br>2015–2019: -3.8 (-5.2, -2.4), p<0.001<br>2001–2019: AAPC=1.4 (0.9-1.8), p<0.001        |
|                        | 1.5-1.7 | 1.6-1.8 | 1.6-1.8 | 1.8-2.0 | 1.8-1.9 | 1.9-2.1 | 2.0-2.2 | 2.1-2.3 | 2.0-2.2 | 2.1-2.3 | 2.2-2.4 | 2.2-2.4 | 2.1-2.3 | 2.2-2.4 | 2.2-2.4 | 2.2-2.4 | 2.1-2.3 | 2.0-2.2 | 1.9-2.1 |                                                                                                                                                                             |
| NH Black women         | 0.4     | 0.4     | 0.6     | 0.5     | 0.5     | 0.4     | 0.4     | 0.4     | 0.6     | 0.5     | 0.5     | 0.5     | 0.4*    | 0.5     | 0.5     | 0.5     | 0.7     | 0.6     | 0.7     | 2013–2019: APC=5.7 (1.3, 10.4), p=0.015<br>2001–2019: AAPC=1.7 (0.0, 3.4), p=0.046                                                                                          |
|                        | 0.4-0.6 | 0.3-0.5 | 0.5-0.7 | 0.4-0.6 | 0.4-0.6 | 0.3-0.5 | 0.4-0.5 | 0.3-0.5 | 0.5-0.7 | 0.4-0.6 | 0.4-0.6 | 0.4-0.6 | 0.4-0.5 | 0.4-0.6 | 0.4-0.6 | 0.4-0.6 | 0.5-0.8 | 0.5-0.7 | 0.6-0.8 |                                                                                                                                                                             |
| NH Asian Pacific women | 0.4     | 0.5     | 0.5     | 0.5     | 0.5     | 0.6     | 0.6     | 0.5     | 0.6*    | 0.5     | 0.7     | 0.5     | 0.5     | 0.6     | 0.5     | 0.5     | 0.6     | 0.6     | 0.6     |                                                                                                                                                                             |
|                        | 0.2-0.6 | 0.4-0.7 | 0.4-0.7 | 0.4-0.8 | 0.4-0.7 | 0.4-0.8 | 0.4-0.8 | 0.4-0.7 | 0.5-0.8 | 0.4-0.7 | 0.6-0.9 | 0.4-0.7 | 0.3-0.6 | 0.5-0.8 | 0.4-0.7 | 0.4-0.6 | 0.4-0.7 | 0.4-0.7 | 0.4-0.7 |                                                                                                                                                                             |
| Hispanic women         | 0.4     | 0.5     | 0.6     | 0.6     | 0.6     | 0.6     | 0.6     | 0.5     | 0.5     | 0.6     | 0.6     | 0.7     | 0.7     | 0.6*    | 0.7     | 0.6     | 0.6     | 0.6     | 0.6     |                                                                                                                                                                             |
|                        | 0.3-0.6 | 0.4-0.7 | 0.5-0.7 | 0.5-0.7 | 0.4-0.7 | 0.5-0.7 | 0.5-0.7 | 0.4-0.6 | 0.4-0.6 | 0.5-0.7 | 0.5-0.7 | 0.6-0.8 | 0.6-0.8 | 0.5-0.7 | 0.6-0.8 | 0.5-0.7 | 0.5-0.6 | 0.5-0.7 | 0.6-0.7 |                                                                                                                                                                             |

Data source: The 2001-2019 National Vital Statistics System's multiple cause-of-death mortality files. NH=non-Hispanic; Estimates for non-Hispanic American Indians or Alaska Natives are not reported due to too many suppressions over the years. \*: Joinpoint, which is identified in this year indicating significant changes in nonlinear trends using permutation tests. APC=annual percentage change. AAPC=average APC. ‡: Age-specific rate for each specific age group. †: Unreliable.

Supplemental Table 2. Age-adjusted<sup>§</sup> firearm death by suicide rates per 100,000 population and 95% confidence interval by age, race/ethnicity, and sex: U.S., 2001-2019

|                      | 2001      | 2002      | 2003      | 2004      | 2005      | 2006      | 2007      | 2008      | 2009      | 2010      | 2011      | 2012      | 2013      | 2014      | 2015      | 2016      | 2017      | 2018      | 2019      | Trends                                                                            |
|----------------------|-----------|-----------|-----------|-----------|-----------|-----------|-----------|-----------|-----------|-----------|-----------|-----------|-----------|-----------|-----------|-----------|-----------|-----------|-----------|-----------------------------------------------------------------------------------|
| U.S. men             | 11.1      | 11.1      | 10.8      | 10.4      | 10.6      | 10.3*     | 10.4      | 10.7      | 10.9      | 11.2      | 11.2      | 11.5      | 11.5      | 11.4      | 11.6      | 12.0      | 12.4      | 12.6      | 12.3      | 2001–2006: APC=−1.4 (−2.4, −0.4), p=0.011; 2006–2019: APC=1.5 (1.3, 1.7), p<0.001 |
|                      | 10.9-11.2 | 10.9-11.3 | 10.6-11.0 | 10.2-10.6 | 10.4-10.7 | 10.1-10.5 | 10.2-10.6 | 10.6-10.9 | 10.7-11.0 | 11.0-11.3 | 11.0-11.4 | 11.3-11.6 | 11.4-11.7 | 11.3-11.6 | 11.4-11.8 | 11.8-12.1 | 12.2-12.6 | 12.4-12.7 | 12.4-12.4 | 12.1-12.4                                                                         |
| Men aged 15-24       | 9.4       | 9.1       | 8.9       | 8.8       | 8.1       | 8.2*      | 7.8       | 8.2       | 8.1       | 8.3       | 8.6       | 8.8       | 8.6*      | 9.0       | 9.7       | 10.5      | 11.9      | 12.1      | 11.5      | 2001–2007: APC=−2.8 (−4.8, −0.8), p=0.010; 2013–2019: APC=6.1 (4.2, 8.1), p<0.001 |
|                      | 9.0-9.8   | 8.6-9.5   | 8.5-9.3   | 8.4-9.2   | 7.8-8.5   | 7.8-8.5   | 7.4-8.2   | 7.8-8.6   | 7.7-8.4   | 7.9-8.6   | 8.2-9.0   | 8.4-9.2   | 8.2-9.0   | 8.6-9.3   | 9.3-10.1  | 10.1-11.0 | 11.5-12.4 | 11.6-12.5 | 11.0-11.9 | 2001–2019: AAPC=1.6 (0.5, 2.8), p=0.005                                           |
| Men aged 25-34       | 11.3      | 10.5      | 10.6      | 10.0      | 10.1      | 9.6*      | 10.2      | 10.2      | 9.9       | 11.1      | 11.2      | 11.1      | 11.4      | 11.1      | 11.9      | 12.5      | 12.9      | 12.6      | 13.0      | 2001–2006: APC=−2.5 (−4.2, −0.8), p=0.007; 2006–2019: APC=2.3 (2.0, 2.7), p<0.001 |
|                      | 10.8-11.8 | 10.0-10.9 | 10.2-11.1 | 9.6-10.5  | 9.6-10.5  | 9.1-10.0  | 9.8-10.6  | 9.7-10.6  | 9.5-10.4  | 10.6-11.5 | 10.7-11.6 | 10.6-11.5 | 11.0-11.9 | 10.7-11.5 | 11.5-12.4 | 12.0-12.9 | 12.4-13.3 | 12.2-13.1 | 12.5-13.4 | 2001–2019: AAPC=1.0 (0.5, 1.5), p<0.001                                           |
| Men aged 35-44       | 11.4      | 12.0      | 11.3      | 10.9      | 11.2*     | 11.0      | 11.2      | 11.2      | 11.8      | 12.0      | 11.7      | 12.1      | 12.3      | 11.6      | 12.1      | 12.6      | 12.7      | 13.1      | 12.9      | 2005–2019: APC=1.2 (0.9, 1.5), p<0.001                                            |
|                      | 10.9-11.8 | 11.6-12.5 | 10.8-11.7 | 10.5-11.3 | 10.7-11.6 | 10.5-11.4 | 10.8-11.7 | 10.7-11.6 | 11.3-12.2 | 11.5-12.5 | 11.3-12.2 | 11.6-12.6 | 11.8-12.8 | 11.2-12.1 | 11.6-12.6 | 12.1-13.1 | 12.2-13.2 | 12.6-13.6 | 12.4-13.4 | 2001–2019: AAPC=0.6 (0.1, 1.0), p=0.021                                           |
| Men aged 45-54       | 13.2      | 13.6      | 13.8      | 13.5      | 14.1      | 13.7      | 13.8      | 14.5      | 15.0      | 15.8      | 15.4*     | 15.6      | 15.5      | 14.9      | 14.9      | 15.0      | 15.3      | 15.1      | 14.5      |                                                                                   |
|                      | 12.7-13.7 | 13.1-14.2 | 13.3-14.3 | 13.0-14.0 | 13.6-14.6 | 13.2-14.2 | 13.3-14.3 | 14.0-15.0 | 14.5-15.5 | 15.2-16.3 | 14.8-15.9 | 15.0-16.1 | 15.0-16.1 | 14.4-15.4 | 14.4-15.4 | 14.5-15.5 | 14.8-15.9 | 14.6-15.6 | 13.9-15.0 |                                                                                   |
| Men aged 55-64       | 14.7      | 15.0      | 14.8      | 14.1      | 14.5      | 14.2      | 15.0      | 16.2      | 16.2      | 16.4      | 16.6      | 17.5*     | 17.0      | 17.3      | 16.8      | 17.1      | 17.6      | 18.3      | 17.7      |                                                                                   |
|                      | 14.0-15.4 | 14.4-15.7 | 14.2-15.5 | 13.5-14.7 | 13.9-15.1 | 13.6-14.8 | 14.4-15.6 | 15.6-16.9 | 15.6-16.8 | 15.8-17.0 | 16.0-17.2 | 16.9-18.1 | 16.4-17.5 | 16.7-17.8 | 16.2-17.3 | 16.5-17.7 | 17.1-18.2 | 17.7-18.9 | 17.1-18.2 |                                                                                   |
| Men aged 65-74       | 19.1      | 19.4      | 18.2      | 17.2*     | 17.3      | 17.2      | 16.9      | 18.5      | 18.6      | 18.3      | 18.3      | 18.3      | 19.2      | 19.7      | 19.3      | 19.2      | 19.2      | 20.1      | 18.8      | 2001–2004: APC=−4.1 (−8.8, 0.9), p=0.072; 2004–2019: APC=0.9 (0.6, 1.2), p<0.001  |
|                      | 18.1-20.0 | 18.4-20.3 | 17.3-19.1 | 16.4-18.1 | 16.4-18.2 | 16.3-18.1 | 16.1-17.8 | 17.6-19.3 | 17.8-19.5 | 17.4-19.1 | 17.5-19.1 | 17.5-19.1 | 18.4-20.0 | 18.9-20.4 | 18.6-20.1 | 18.5-20.0 | 18.4-19.9 | 19.4-20.8 | 18.1-19.5 |                                                                                   |
| Men aged 75-84       | 30.6      | 30.9      | 28.6      | 28.2      | 29.1      | 27.4      | 27.5      | 27.7      | 27.4*     | 26.3      | 28.0      | 28.8      | 28.5      | 28.0      | 28.7      | 29.5      | 29.7      | 30.8      | 30.0      | 2001–2009: APC=−1.5 (−3.2, −1.4), p<0.001; 2009–2019: APC=1.3 (0.8, 1.7), p<0.001 |
|                      | 29.1-32.1 | 29.4-32.4 | 27.1-30.0 | 26.7-29.6 | 27.6-30.5 | 26.0-28.8 | 26.1-28.9 | 26.3-29.1 | 26.0-28.8 | 24.9-27.6 | 26.6-29.4 | 27.4-30.2 | 27.1-29.8 | 26.6-29.3 | 27.3-30.0 | 28.2-30.9 | 28.3-31.0 | 29.5-32.1 | 28.7-31.3 |                                                                                   |
| Men aged ≥85         | 40.1      | 40.7      | 39.5      | 37.6      | 37.5      | 36.4      | 36.7      | 34.2*     | 34.4      | 36.3      | 35.1      | 36.7      | 37.2      | 40.0      | 37.8      | 37.4      | 40.8      | 37.8      | 40.7      | 2001–2008: APC=−2.3 (−2.2, −0.8), p<0.001; 2008–2019: APC=1.3 (0.9, 1.7), p<0.001 |
|                      | 36.6-43.6 | 37.2-44.1 | 36.2-42.9 | 34.3-40.8 | 34.4-40.7 | 33.3-39.4 | 33.7-39.7 | 31.4-37.0 | 31.6-37.2 | 33.5-39.1 | 32.4-37.8 | 34.0-39.4 | 34.5-39.8 | 37.3-42.7 | 35.2-40.3 | 34.9-40.0 | 38.2-43.4 | 35.3-40.3 | 38.1-43.3 |                                                                                   |
| NH White men         | 12.9      | 13.1      | 12.8      | 12.4      | 12.7*     | 12.4      | 12.6      | 13.2      | 13.4      | 14.0      | 14.2      | 14.5      | 14.8      | 14.6      | 15.1      | 15.4      | 16.0      | 16.2      | 15.8      | 2005–2019: APC=2.0 (1.7, 2.2), p<0.001                                            |
|                      | 12.7-13.2 | 12.8-13.3 | 12.6-13.1 | 12.2-12.6 | 12.5-12.9 | 12.2-12.6 | 12.4-12.9 | 13.0-13.5 | 13.2-13.7 | 13.7-14.2 | 14.0-14.4 | 14.3-14.7 | 14.5-15.0 | 14.4-14.9 | 14.8-15.3 | 15.2-15.7 | 15.8-16.3 | 15.9-16.4 | 15.6-16.0 | 2001–2019: AAPC=1.3 (0.9, 1.7), p<0.001                                           |
| NH Black men         | 6.1       | 6.1       | 5.5       | 5.6       | 5.5       | 5.5       | 5.0*      | 5.4       | 5.4       | 5.3       | 5.4       | 5.5       | 5.2       | 5.3       | 5.3*      | 5.8       | 6.3       | 6.6       | 6.9       | 2001–2007: APC=−2.2 (−3.2, −1.3), p<0.001; 2015–2019: APC=7.0 (5.2, 8.7), p<0.001 |
|                      | 5.7-6.5   | 5.7-6.5   | 5.1-5.9   | 5.2-6.0   | 5.1-5.9   | 5.1-5.9   | 4.7-5.4   | 5.1-5.8   | 5.1-5.8   | 4.9-5.6   | 5.0-5.7   | 5.1-5.8   | 4.8-5.5   | 5.0-5.7   | 5.0-5.6   | 5.5-6.2   | 6.0-6.7   | 6.2-7.0   | 6.5-7.3   | 2001–2019: AAPC=0.9 (0.4, 1.3), p<0.001                                           |
| NH Asian Pacific men | 2.6       | 2.4       | 2.5       | 2.2       | 1.8*      | 2.1       | 2.7       | 2.1       | 2.4       | 2.4       | 2.2       | 2.6       | 2.6       | 2.3       | 2.6       | 3.1       | 3.1       | 3.0       | 3.2       | 2005–2019: APC=3.1 (2.0, 4.1), p<0.001                                            |
|                      | 2.2-3.1   | 2.0-2.9   | 2.1-2.9   | 1.8-2.6   | 1.4-2.1   | 1.7-2.4   | 2.3-3.1   | 1.8-2.5   | 2.0-2.8   | 2.1-2.8   | 1.9-2.6   | 2.2-2.9   | 2.3-3.0   | 1.9-2.6   | 2.2-2.9   | 2.8-3.5   | 2.7-3.4   | 2.7-3.3   | 2.8-3.5   |                                                                                   |
| Hispanic men         | 4.8       | 4.9       | 4.6       | 4.5       | 4.1       | 3.9       | 4.5       | 4.1       | 4.3       | 4.2       | 3.9       | 4.1       | 3.8*      | 4.1       | 4.0       | 4.5       | 4.6       | 5.1       | 4.6       | 2001–2013: APC=−1.6 (−2.3, −0.9), p<0.001; 2013–2019: APC=4.3 (2.6, 6.1), p<0.001 |
|                      | 4.4-5.2   | 4.5-5.3   | 4.2-5.0   | 4.1-4.8   | 3.8-4.5   | 3.6-4.5   | 4.2-4.9   | 3.7-4.4   | 4.0-4.7   | 3.9-4.5   | 3.6-4.2   | 3.8-4.4   | 3.5-4.1   | 3.8-4.4   | 3.8-4.3   | 4.2-4.7   | 4.3-4.8   | 4.8-5.4   | 4.4-4.9   |                                                                                   |
| U.S.                 | 1.4       | 1.4       | 1.4       | 1.5       | 1.4       | 1.4*      | 1.4       | 1.4       | 1.5       | 1.5       | 1.6       | 1.7       | 1.8       | 1.8       | 1.8       | 1.9       | 1.9       | 1.9       | 1.8       | 2006–2019: APC=2.9 (2.4, 3.4), p<0.001                                            |

|                        |                |                |                |                |                 |                 |                 |                 |                |                 |                 |                |                |                 |                 |                 |                 |                |                |                                                                                                                                 |
|------------------------|----------------|----------------|----------------|----------------|-----------------|-----------------|-----------------|-----------------|----------------|-----------------|-----------------|----------------|----------------|-----------------|-----------------|-----------------|-----------------|----------------|----------------|---------------------------------------------------------------------------------------------------------------------------------|
| women                  | 1.4-1.5        | 1.4-1.5        | 1.3-1.5        | 1.4-1.5        | 1.3-1.4         | 1.3-1.4         | 1.4-1.5         | 1.4-1.5         | 1.4-1.6        | 1.4-1.5         | 1.6-1.7         | 1.6-1.7        | 1.7-1.8        | 1.7-1.8         | 1.8-1.9         | 1.9-2.0         | 1.8-1.9         | 1.8-2.0        | 1.8-1.9        | 2001–2019: AAPC=1.9 (1.1, 2.7), p<0.001                                                                                         |
| Women aged 15-24       | 1.0<br>0.9-1.1 | 1.0<br>0.8-1.1 | 1.0<br>0.8-1.1 | 1.1<br>0.9-1.2 | 0.9<br>0.8-1.1  | 0.9<br>0.7-1.0  | 0.8<br>0.7-0.9  | 0.9*<br>0.8-1.0 | 1.0<br>0.8-1.1 | 0.9<br>0.8-1.1  | 1.1<br>0.9-1.2  | 1.1<br>1.0-1.3 | 1.3<br>1.1-1.4 | 1.2<br>1.1-1.4  | 1.4<br>1.2-1.5  | 1.6<br>1.4-1.7  | 1.5*<br>1.4-1.7 | 1.6<br>1.5-1.8 | 1.4<br>1.2-1.6 |                                                                                                                                 |
| Women aged 25-34       | 1.6<br>1.4-1.8 | 1.6<br>1.5-1.8 | 1.4<br>1.3-1.6 | 1.6<br>1.4-1.7 | 1.5<br>1.3-1.6  | 1.3*<br>1.2-1.5 | 1.4<br>1.2-1.5  | 1.5<br>1.4-1.7  | 1.7<br>1.5-1.9 | 1.5<br>1.3-1.7  | 1.9<br>1.7-2.1  | 1.9<br>1.7-2.1 | 2.0<br>1.8-2.2 | 1.8<br>1.6-2.0  | 2.1<br>1.9-2.3  | 2.2<br>1.9-2.4  | 2.2*<br>2.0-2.4 | 2.2<br>2.0-2.4 | 2.1<br>1.9-2.3 |                                                                                                                                 |
| Women aged 35-44       | 2.1<br>1.9-2.3 | 2.2<br>2.0-2.4 | 2.1<br>1.9-2.2 | 2.2<br>2.0-2.4 | 2.0*<br>1.8-2.2 | 2.1<br>1.9-2.3  | 2.3<br>2.1-2.5  | 2.1<br>1.9-2.3  | 2.1<br>1.9-2.3 | 2.3<br>2.1-2.5  | 2.3<br>2.1-2.5  | 2.4<br>2.2-2.6 | 2.3<br>2.1-2.5 | 2.4<br>2.2-2.6  | 2.5<br>2.3-2.7  | 2.7<br>2.5-3.0  | 2.5<br>2.3-2.7  | 2.5<br>2.3-2.7 | 2.4<br>2.2-2.7 | 2005–2019: APC=1.6 (1.1, 2.0), p<0.001<br>2001–2019: AAPC=1.1 (0.3, 1.9), p=0.009                                               |
| Women aged 45-54       | 2.4<br>2.1-2.6 | 2.3<br>2.0-2.5 | 2.5<br>2.2-2.7 | 2.8<br>2.6-3.0 | 2.4<br>2.2-2.6  | 2.6<br>2.4-2.8  | 2.5<br>2.3-2.7  | 2.7<br>2.5-2.9  | 2.9<br>2.7-3.1 | 2.6<br>2.4-2.9  | 3.2<br>2.9-3.4  | 3.2<br>3.0-3.4 | 3.2<br>2.9-3.4 | 3.5*<br>3.3-3.7 | 3.2<br>3.0-3.4  | 3.3<br>3.0-3.5  | 3.4<br>3.2-3.7  | 3.2<br>3.0-3.5 | 3.4<br>3.1-3.6 |                                                                                                                                 |
| Women aged 55-64       | 2.4<br>2.1-2.7 | 2.2<br>1.9-2.4 | 2.2<br>1.9-2.4 | 2.2<br>2.0-2.4 | 2.1*<br>1.9-2.3 | 2.3<br>2.1-2.5  | 2.3<br>2.0-2.5  | 2.3<br>2.1-2.5  | 2.3<br>2.1-2.6 | 2.6<br>2.4-2.8  | 2.4<br>2.2-2.6  | 2.5<br>2.2-2.7 | 2.9<br>2.7-3.2 | 2.8<br>2.6-3.1  | 3.1<br>2.8-3.3  | 3.0*<br>2.8-3.3 | 3.0<br>2.7-3.2  | 3.1<br>2.9-3.4 | 2.9<br>2.7-3.2 |                                                                                                                                 |
| Women aged 65-74       | 1.7<br>1.4-1.9 | 1.6<br>1.3-1.8 | 1.6<br>1.4-1.9 | 1.5<br>1.3-1.8 | 1.6<br>1.4-1.9  | 1.6<br>1.4-1.9  | 1.5<br>1.3-1.8  | 1.6*<br>1.4-1.9 | 1.8<br>1.5-2.0 | 1.8<br>1.5-2.0  | 2.0*<br>1.8-2.3 | 1.9<br>1.7-2.3 | 2.2<br>1.9-2.4 | 2.1<br>1.8-2.3  | 2.0<br>1.7-2.2  | 2.3<br>2.1-2.6  | 2.1<br>1.9-2.3  | 2.3<br>2.1-2.5 | 2.2<br>2.0-2.4 | 2011–2019: APC=1.7 (0.9, 2.5), p<0.001                                                                                          |
| Women aged 75-84       | 1.5<br>1.3-1.8 | 1.4<br>1.1-1.6 | 1.5<br>1.2-1.8 | 1.4<br>1.1-1.7 | 1.3<br>1.0-1.6  | 1.2<br>1.0-1.5  | 1.4<br>1.1-1.6  | 1.4<br>1.1-1.7  | 1.4<br>1.1-1.6 | 1.4*<br>1.1-1.6 | 1.3<br>1.1-1.6  | 1.5<br>1.2-1.8 | 1.5<br>1.3-1.8 | 1.7<br>1.4-2.0  | 1.8*<br>1.5-2.1 | 1.7<br>1.4-1.9  | 1.7<br>1.4-2.0  | 1.6<br>1.4-1.9 | 1.6<br>1.3-1.9 |                                                                                                                                 |
| Women aged ≥85         | 1.0<br>0.7-1.4 | 0.8<br>0.5-1.2 | 1.0<br>0.6-1.4 | ‡<br>0.4-0.9   | 0.9<br>0.6-1.3  | 0.7<br>0.5-1.1  | 0.6<br>0.4-0.9  | 1.0<br>0.7-1.4  | 0.7<br>0.4-1.0 | 0.8<br>0.5-1.2  | 1.0<br>0.7-1.4  | 1.1<br>0.8-1.5 | 1.0<br>0.7-1.3 | 0.9<br>0.6-1.3  | 0.9<br>0.7-1.3  | 0.8<br>0.6-1.2  | 0.9<br>0.6-1.2  | 1.0<br>0.7-1.4 | 1.2<br>0.9-1.6 | 2005–2019: AAPC=2.1 (0.3, 3.9), p=0.024                                                                                         |
| NH White women         | 1.8<br>1.7-1.9 | 1.8<br>1.7-1.8 | 1.8<br>1.7-1.8 | 1.9<br>1.8-1.9 | 1.7<br>1.7-18   | 1.8<br>1.7-19   | 1.8*<br>1.7-1.9 | 1.9<br>1.8-2.0  | 2.0<br>1.9-2.1 | 2.0<br>1.9-2.1  | 2.2<br>2.1-2.3  | 2.3<br>2.2-2.4 | 2.4<br>2.3-2.5 | 2.5<br>2.4-2.6  | 2.6*<br>2.5-2.7 | 2.7<br>2.6-2.8  | 2.6<br>2.5-2.7  | 2.6<br>2.5-2.8 | 2.6<br>2.5-2.7 |                                                                                                                                 |
| NH Black women         | 0.7<br>0.6-0.8 | 0.5<br>0.4-0.6 | 0.6<br>0.4-0.7 | 0.5<br>0.4-0.6 | 0.5<br>0.4-0.6  | 0.5<br>0.4-0.6  | 0.5<br>0.4-0.6  | 0.5*<br>0.4-0.6 | 0.5<br>0.4-0.6 | 0.6<br>0.5-0.7  | 0.5<br>0.4-0.6  | 0.7<br>0.5-0.8 | 0.5<br>0.4-0.6 | 0.5<br>0.4-0.7  | 0.5<br>0.4-0.6  | 0.8<br>0.7-0.9  | 0.7<br>0.6-0.8  | 0.8<br>0.7-0.9 | 0.8<br>0.6-0.9 | 2001–2008: APC=-3.4 (-7.2, 0.6), p=0.086;<br>2008–2019: APC=5.0 (3.2, 6.8), p<0.001<br>2001–2019: AAPC=1.6 (-0.1, 3.4), p=0.072 |
| NH Asian Pacific women | 0.4<br>0.3-0.6 | 0.3<br>0.2-0.5 | 0.4<br>0.3-0.6 | 0.4<br>0.3-0.6 | ‡<br>0.1-0.4    | 0.3<br>0.2-0.4  | 0.3<br>0.2-0.5  | ‡<br>0.1-0.4    | 0.3<br>0.2-0.4 | 0.2<br>0.1-0.4  | 0.3<br>0.2-0.5  | 0.3<br>0.2-0.4 | 0.4<br>0.3-0.5 | 0.3<br>0.2-0.5  | 0.4<br>0.3-0.6  | 0.4<br>0.3-0.5  | 0.5<br>0.4-0.7  | 0.5<br>0.4-0.7 | 0.4<br>0.3-0.5 | 2009–2019: AAPC=6.9 (5.1, 8.7), p<0.001                                                                                         |
| Hispanic women         | 0.4<br>0.3-0.5 | 0.4<br>0.3-0.5 | 0.3<br>0.2-0.4 | 0.5<br>0.4-0.6 | 0.3<br>0.3-0.4  | 0.3<br>0.2-0.4  | 0.4*<br>0.3-0.4 | 0.3<br>0.3-0.4  | 0.4<br>0.3-0.5 | 0.4<br>0.3-0.5  | 0.4<br>0.3-0.4  | 0.4<br>0.3-0.5 | 0.5<br>0.4-0.6 | 0.4<br>0.4-0.5  | 0.5<br>0.4-0.6  | 0.5<br>0.5-0.6  | 0.6<br>0.5-0.7  | 0.6<br>0.5-0.7 | 0.6<br>0.5-0.7 | 2007–2019: APC=5.2 (4.0, 6.5), p<0.001<br>2001–2019: AAPC=2.4 (0.7, 4.1), p=0.005                                               |

Data source: The 2001-2019 National Vital Statistics System's multiple cause-of-death mortality files. NH=non-Hispanic; Estimates for non-Hispanic American Indians or Alaska Natives are not reported due to too many suppressions over the years. \*: Joinpoint, which is identified in this year indicating significant changes in nonlinear trends using permutation tests. APC=annual percentage change. AAPC=average APC. ‡: Age-specific rate for each specific age group. †: Unreliable.

Supplemental Table 3. Month of the year and day of the week patterns of intentional overdose deaths: U.S., 2001-2019

| Time Period | Among Men |    |       |             |        | Among Women |    |       |             |        |
|-------------|-----------|----|-------|-------------|--------|-------------|----|-------|-------------|--------|
|             | Mean*     | SD | IRR   | 95% CI      | p      | Mean*       | SD | IRR   | 95% CI      | p      |
| Month       |           |    |       |             |        |             |    |       |             |        |
| January     | 184       | 27 | 0.969 | 0.925-1.015 | 0.183  | 209         | 34 | 0.927 | 0.887-0.967 | <0.001 |
| February    | 179       | 26 | 0.947 | 0.903-0.992 | 0.022  | 208         | 27 | 0.924 | 0.885-0.965 | <0.001 |
| March       | 183       | 25 | 0.968 | 0.924-1.014 | 0.171  | 213         | 35 | 0.944 | 0.904-0.985 | 0.008  |
| April       | 184       | 25 | 0.968 | 0.924-1.015 | 0.176  | 220         | 38 | 0.978 | 0.937-1.020 | 0.296  |
| May         | 189       | 24 | 0.995 | 0.950-1.043 | 0.846  | 224         | 29 | 0.993 | 0.952-1.036 | 0.753  |
| June        | 189       | 30 | 0.995 | 0.950-1.042 | 0.832  | 220         | 35 | 0.974 | 0.934-1.017 | 0.231  |
| July +      | 190       | 22 | 1.000 | -           |        | 225         | 30 | 1.000 | -           |        |
| August      | 186       | 29 | 0.979 | 0.935-1.026 | 0.371  | 222         | 33 | 0.984 | 0.943-1.026 | 0.443  |
| September   | 180       | 29 | 0.952 | 0.908-0.997 | 0.038  | 212         | 34 | 0.940 | 0.900-0.981 | 0.005  |
| October     | 170       | 19 | 0.897 | 0.855-0.940 | <0.001 | 210         | 29 | 0.933 | 0.894-0.974 | 0.002  |
| November    | 171       | 19 | 0.901 | 0.859-0.944 | <0.001 | 205         | 33 | 0.911 | 0.872-0.951 | <0.001 |
| December    | 161       | 23 | 0.849 | 0.809-0.891 | <0.001 | 194         | 25 | 0.861 | 0.824-0.900 | <0.001 |
| Day         |           |    |       |             |        |             |    |       |             |        |
| Monday +    | 28        | 7  | 1.000 | -           |        | 33          | 8  | 1.000 | -           |        |
| Tuesday     | 27        | 7  | 0.962 | 0.929-0.996 | 0.031  | 32          | 8  | 0.962 | 0.932-0.994 | 0.019  |
| Wednesday   | 27        | 7  | 0.946 | 0.914-0.980 | 0.002  | 31          | 8  | 0.943 | 0.913-0.974 | <0.001 |
| Thursday    | 26        | 7  | 0.925 | 0.893-0.958 | <0.001 | 30          | 8  | 0.904 | 0.875-0.934 | <0.001 |
| Friday      | 26        | 7  | 0.911 | 0.879-0.944 | <0.001 | 30          | 8  | 0.899 | 0.870-0.929 | <0.001 |
| Saturday    | 25        | 7  | 0.871 | 0.840-0.902 | <0.001 | 29          | 8  | 0.873 | 0.844-0.902 | <0.001 |
| Sunday      | 24        | 7  | 0.852 | 0.822-0.884 | <0.001 | 31          | 8  | 0.921 | 0.892-0.952 | <0.001 |

Data source: The 2001-2019 National Vital Statistics System's multiple cause-of-death mortality files. CI=confidence interval.

+: reference group. \*Mean number of intentional drug overdose deaths by month adjusted as the mean number of overdose deaths per day for a given month during 2001-2019 x 30 days.
